# Supplementary material for: The fate of oxygen on graphene-catalyst in the photocatalytic water splitting reaction
Source: Royal Society of Chemistry journal article supplement (doi:10.1039/d1cy01286j), 2021-01-01
Supplement: d1cy01286j1.pdf [file d1cy01286j1.pdf]

## Supplementary Information

### Where Oxygen Goes on Graphene-Catalyst in Water Splitting

Jun Wang,<sup>†a</sup> Zhenbo Peng,<sup>†b</sup> Kaili Zhu,<sup>†a</sup> Xumeng Qiu,<sup>†a</sup> Ting Tao,<sup>a</sup> Dongmei Jia,<sup>a</sup> Gan Jia,<sup>a</sup> Yikang Wang,<sup>a</sup> Wei Ye,<sup>\*a</sup> Wenbo Wu<sup>a</sup> and Peng Gao<sup>\*a</sup>

<sup>a</sup> College of Material, Chemistry and Chemical Engineering, Hangzhou Normal University, Hangzhou, Zhejiang 311121, P. R. China

<sup>b</sup> Zhejiang Collaborative Innovation Center for High Value Utilization of Byproducts from Ethylene Project, Ningbo Polytechnic, Ningbo, Zhejiang 315800, P. R. China

Corresponding author:

E-mail address: yewei@hznu.edu.cn; gaopeng@hrbeu.edu.cn.

## 1. Characterizations

The X-ray diffraction (XRD) measurements were carried out on a German Bruker D8-ADVANCE diffractometer with Cu K $\alpha$  radiation; the scanning range was 10–70° with a 5° min<sup>-1</sup> scanning speed. The morphologies of obtained products were analyzed by using a JSM-6390LV scanning electron microscopy (SEM). The morphologies of the samples were observed on transmission electron microscopy (TEM, JEOLJEM-2100). A high-resolution transmission electron microscope (HRTEM, JEM-2100) was used to observe the morphology of the prepared samples at 200 kV. Fourier transform infrared (FT-IR) spectra were recorded using an FTIR Analyzer (Perkin-Elmer, Spectrum 400), and the KBr was served as a reference sample. Raman measurement was carried out using a Renishaw in Via Raman spectroscopy, the power of the laser was 1%, and the laser excitation was 532 nm, wavenumber range (100–800 cm<sup>-1</sup>), and the exposure time was 1s. The Brunauer–Emmett–Teller (BET) method was used to measure the specific surface area of the samples using nitrogen adsorption-desorption isotherms at 77 K. The ultraviolet-visible diffuse reflectance spectra (DRS) of the photocatalysts were recorded in the 200–800 nm regions with a UV-2600 ultraviolet-visible spectrophotometer against BaSO<sub>4</sub>. The photoluminescence (PL) spectra were measured on a fluorescence spectrometer (JY HORIBA FluoroLog-3) equipped with an excitation wavelength of 300 nm. X-ray photoelectron spectroscopy (XPS, AXISULTRA) was employed to identify the chemical states of the surface compositions in a Kratos-Axis-Ultra system equipped with monochromatic Al K $\alpha$  X-rays (1486.6 eV). TGA measurements were conducted over a temperature range of 25–800 °C at a heating rate of 10 °C min<sup>-1</sup> Under the N<sub>2</sub> atmosphere. The electron spin resonance (EPR) spectra of the samples were recorded on a Bruker E500 spectrometer in the air at room temperature. The fluorescence lifetimes of the photocatalytic materials were obtained by using a

FLUOROMAX-4 spectrophotometer at room temperature. The photocurrent–time curve was obtained using a three-electrode photoelectrochemical cell and a workstation (CHI600E China) with a 100 W xenon lamp with a 100 mL 0.1 M  $\text{Na}_2\text{SO}_4$  solution as the electrolyte. The In situ Raman spectroscopic detection measurements were performed at room temperature using a HORIBA LabRam spectrometer with a 785 nm excitation wavelength at 0.5mW between 200 and 2500 $\text{cm}^{-1}$ . To avoid laser-induced deintercalation and photochemistry, the laser power was kept below 0.5 mW, the laser spot size of 1mm (Olympus LMPlanFI 50\*, NA 0.50). A charge-coupled device is used to detect the signal after analyzing the signal via a monochromator. The spectrometer was calibrated in frequency using a HOPG crystal.

## **2. Evaluation of photocatalytic water splitting**

Photocatalytic overall water splitting reactions were carried out in a side-irradiation vessel connected to a glass gas-circulation system. It was performed in the CEL-PAEM-D6 online system (China Education AU-light Company Limited, Beijing) under different light irradiation, respectively. A 300 W Xe lamp (CEL-HXF100) was used as an incident light source, and the intensity was 100  $\text{mW cm}^{-2}$ . In a typical photocatalytic overall water splitting reaction, 50 mg as-prepared samples were dispersed in deionized water (50 mL) under constant magnetic stirring and top-irradiation. After completely removing air from the reaction slurry by evacuation, the reaction system was irradiated for one hour. During irradiation, the collected gas was analyzed by A GC-7920 gas chromatograph equipped with a thermal conductivity detector and a 5A molecular sieve column, and  $\text{N}_2$  as the carrier gas.

### 3. CO<sub>2</sub> evaluation measurement

The gas–solid phase CO<sub>2</sub> experiment was conducted in a home-made evaluation system. It was performed in the CEL-PAEM-D6 online system (China Education AU-light Company Limited, Beijing) under UV light irradiation, respectively. A 300 W Xe lamp (CEL-HXF100) was used as an incident light source, and the intensity was 100 mW cm<sup>-2</sup>. In a typical CO<sub>2</sub> evaluation measurement reaction, 50 mg as prepared samples were dispersed in deionized water (50mL) under constant magnetic stirring and top-irradiation. After completely removing air from the reaction slurry by evacuation, the reaction system was irradiated for one hour. Under the light irradiation (a 300 W Xeon lamp coupled with an AM 1.5 filter was used as the light source), the gaseous mixture were analyzed by a gas chromatograph (GC-7920) every 1 h, carbon involved products, such as hydrogen, oxygen, nitrogen, carbon dioxide, etc., were detected by the thermal conductivity detector. The qualitative and quantitative analyses of the gaseous products were based on the external method taking the concentrated standard gases as reference. The data reproducibility was checked by performing the same reaction in duplicate.

### 4. Apparent quantum efficiency (AQE) determination

The apparent quantum efficiency under 365nm light irradiation was measured using the photocatalytic reactor setup according to the following equations:

$$\text{Apparent quantum efficiency (\%)} = \frac{\text{Mols of reacted electrons per unit time}}{\text{Mols of incident photons per unit time}} \times 100$$

$$\text{Mols incident photons per unit time } (N_{\text{Einstein}}) = \frac{\text{Number incident photons per unit time}}{N_A}$$

Number of incident photons  $N_p$  per unit time can be calculated by:

$$N_p = \frac{\text{Intensity (E)}}{\text{Photon energy (E}_p\text{)}}$$

$$\text{photon energy (E}_p\text{)} = \frac{hc}{\lambda}$$

$$E = \text{Irradiance} \times \text{reactor area illuminated} = 0.04 \text{ J} \cdot \text{s}^{-1} \cdot \text{cm}^{-2} \times 50.24 \text{ cm}^2 = 2.01 \text{ J} \cdot \text{s}^{-1}$$

$$E_p = \frac{(6.625 \times 10^{-34} \text{ J} \cdot \text{s}) \times (3 \times 10^{17} \text{ nm} \cdot \text{s}^{-1})}{365 \text{ nm}} = 5.45 \times 10^{-19} \text{ J}$$

$$N_p = \frac{E}{E_p} = \frac{2.01 \text{ J} \cdot \text{s}^{-1}}{5.45 \times 10^{-19} \text{ J}} = 3.69 \times 10^{18} \text{ s}^{-1}$$

$$N_{\text{Einstein}} = \frac{N_p}{N_A} = \frac{3.69 \times 10^{18} \text{ s}^{-1}}{6.02 \times 10^{23} \text{ mol}^{-1}} = 6.13 \times 10^{-6} \text{ mol} \cdot \text{s}^{-1}$$

$$\text{AQE (\%)} = \frac{2 \times H_2 \text{ production rate}}{N_{\text{Einstein}}} \times 100 = \frac{2 \times 5.28 \times 10^{-10} \text{ mol} \cdot \text{s}^{-1}}{6.13 \times 10^{-6} \text{ mol} \cdot \text{s}^{-1}} \times 100 = 0.02\%$$

**Supplemental Figs.**

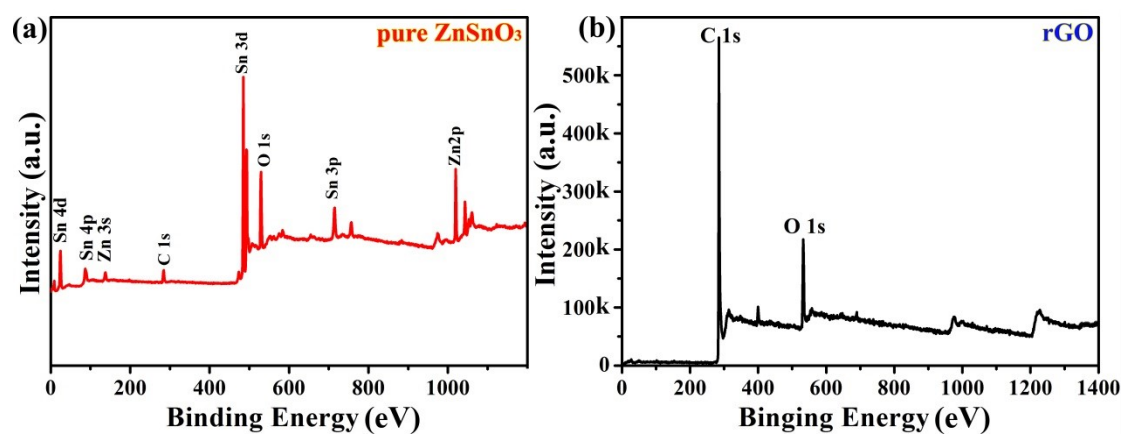

**Fig. S1** The full ranged XPS spectra of (a) ZnSnO<sub>3</sub>-rGO and (b) rGO.

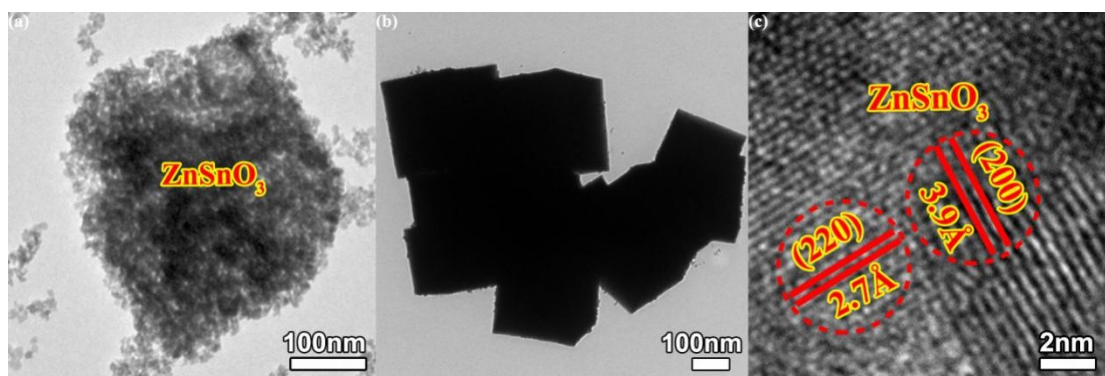

**Fig. S2** (a) TEM image of a typical  $\text{ZnSnO}_3$  sample. (b) TEM image of a typical  $\text{ZnSnO}_3$ -rGO sample. (c) HRTEM image of a typical  $\text{ZnSnO}_3$  sample.

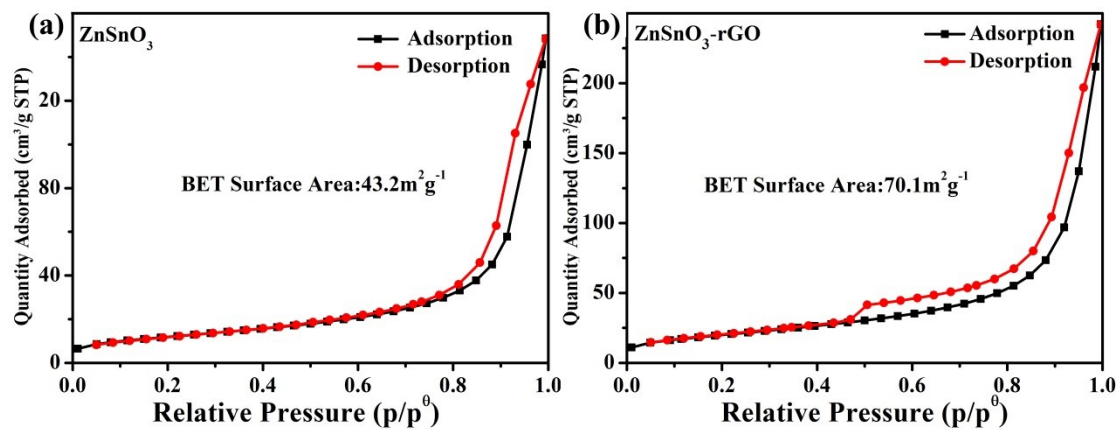

**Fig. S3** Nitrogen adsorption-desorption isotherms of (a)  $\text{ZnSnO}_3$  and (b)  $\text{ZnSnO}_3\text{-rGO}$ .



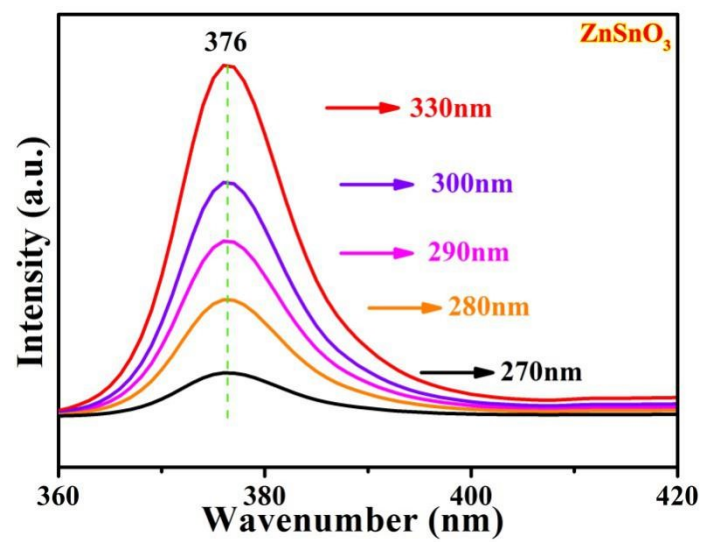

**Fig. S4** PL spectra of ZnSnO<sub>3</sub> with different wavelength excited light.

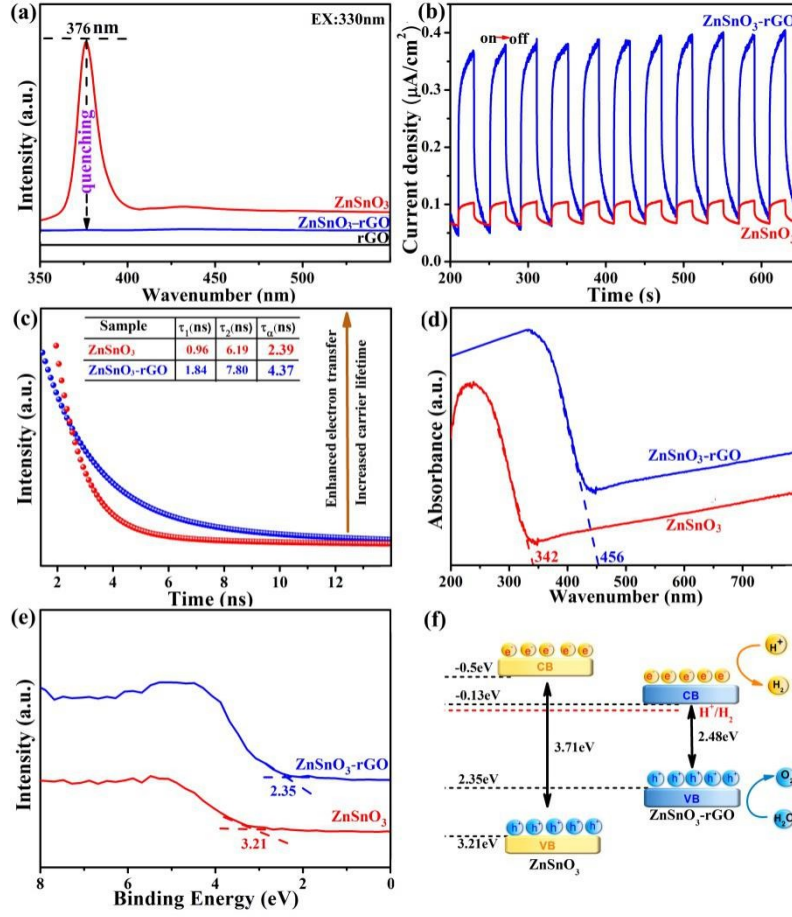

**Fig. S5** (a) PL spectra of rGO, ZnSnO<sub>3</sub> and ZnSnO<sub>3</sub>-rGO at EX=330. (b) Photocurrent density of ZnSnO<sub>3</sub> and ZnSnO<sub>3</sub>-rGO. (c) Fluorescence lifetime of ZnSnO<sub>3</sub> and ZnSnO<sub>3</sub>-rGO. (d) UV-vis DRS of ZnSnO<sub>3</sub> and ZnSnO<sub>3</sub>-rGO samples. (e) Valence-band spectra measured by XPS. (f) The band structures of the ZnSnO<sub>3</sub> and ZnSnO<sub>3</sub>-rGO samples.

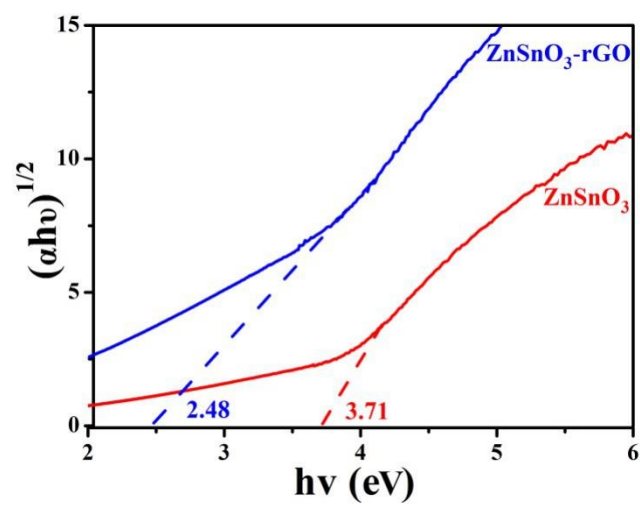

**Fig. S6** Optical band gaps determined by the UV-vis DRS.

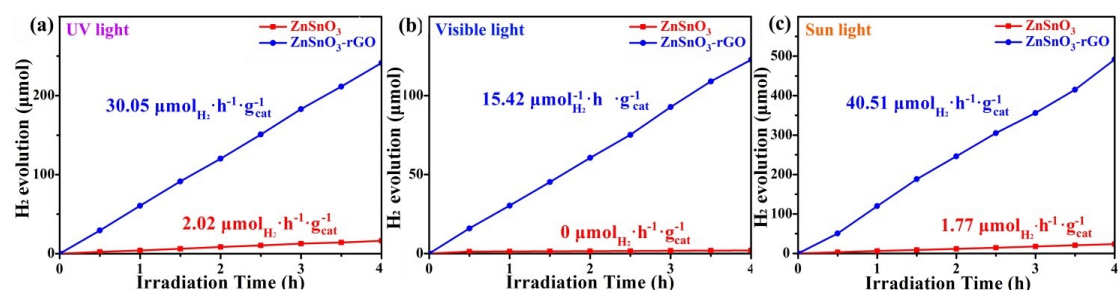

**Fig. S7** Typical time course of hydrogen evolution for  $\text{ZnSnO}_3$  and  $\text{ZnSnO}_3\text{-rGO}$  samples under (a) UV light (b) Visible light and (c) Simulated sunlight.

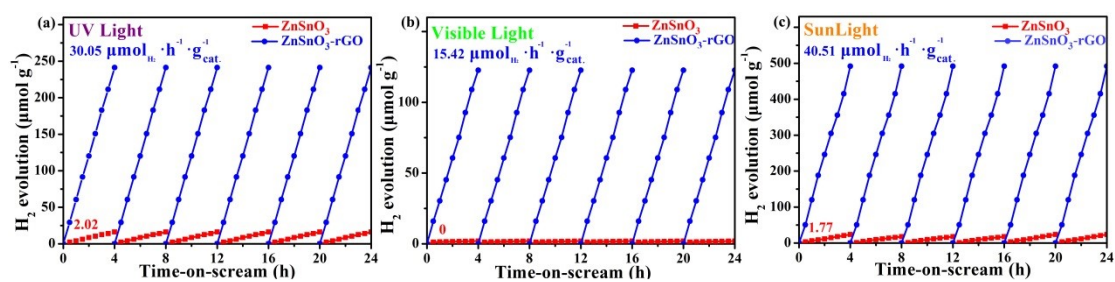

**Fig. S8** Photocatalytic water splitting for  $H_2$  generation in 6 repeated cycles (4 h/cycle) under (a) UV Light (b) Visible Light (c) Simulated sun Light.

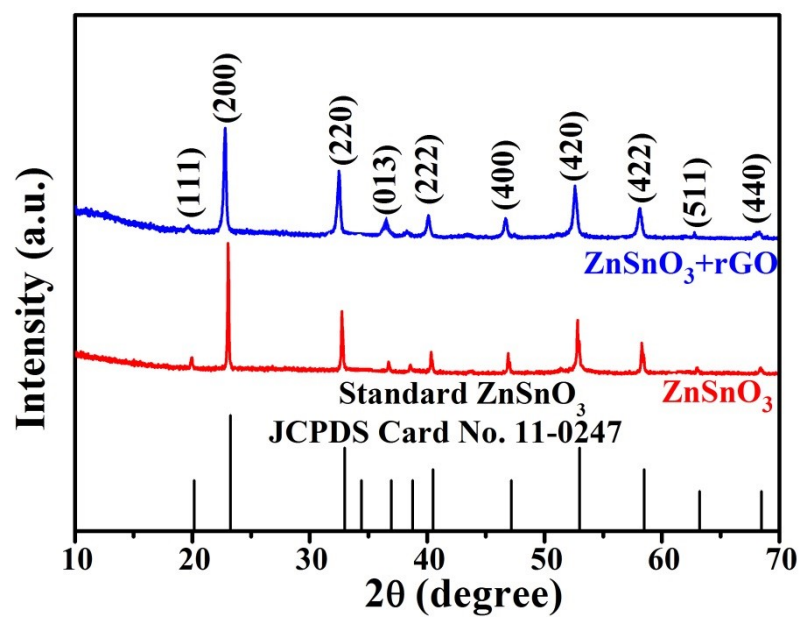

**Fig. S9** XRD patterns of  $\text{ZnSnO}_3$  and  $\text{ZnSnO}_3$ -rGO samples after photocatalytic reaction.

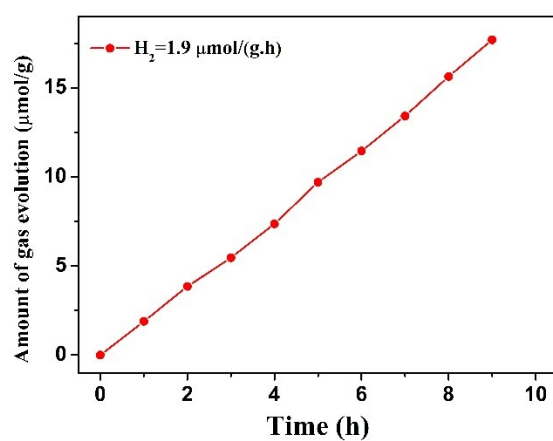

**Fig. S10** Typical time course of hydrogen evolution for ZnSnO<sub>3</sub>-rGO samples under 365nm UV light.

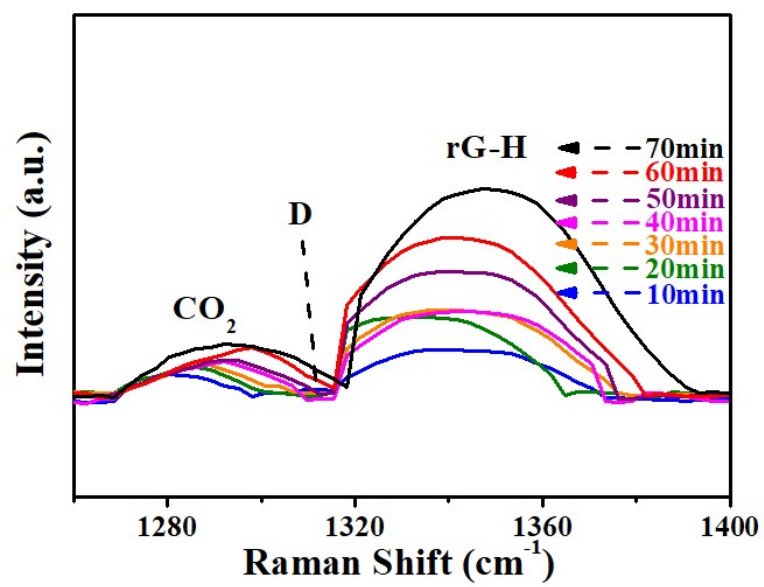

**Fig. S11** In-situ Raman (regional amplification) of ZnSnO<sub>3</sub>-rGO samples.



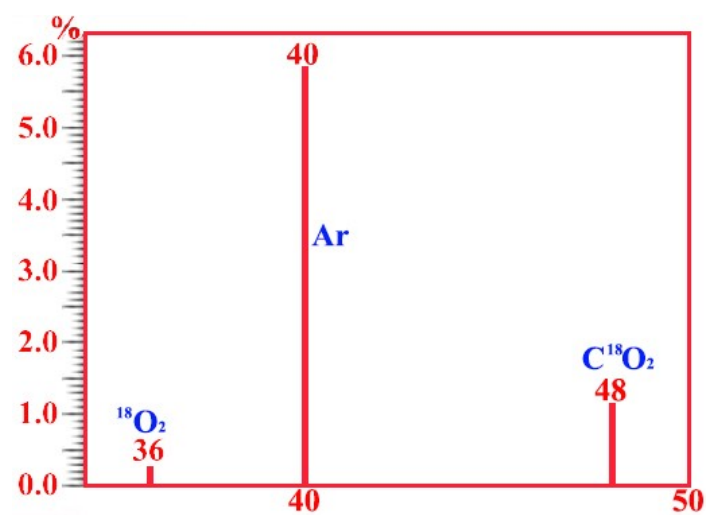

**Fig. S12** MS spectrum of generated  $\text{C}^{18}\text{O}_2$ .
